# Supplementary material for: Multi-orbital engineering of single-atom catalysts: unlocking high-efficiency nitrate reduction
Source: Royal Society of Chemistry journal article supplement (doi:10.1039/d4ta08757g), 2025-01-01
Supplement: d4ta08757g1.pdf [file d4ta08757g1.pdf]

**Supplementary Material for**  
**“Multi-Orbital Engineering of Single-Atom Catalysts:**  
**Unlocking High-Efficiency Nitrate Reduction”**

Chun Wu <sup>a,†</sup>, Yanqing Shen <sup>a,c,†,\*</sup>, Lingling Lv <sup>a</sup>, Xianghui Meng <sup>a</sup>, Xin Yang <sup>a</sup>, Xinyu Wang <sup>a</sup>, Xiangqian Jiang <sup>a</sup>, Qing Ai <sup>b,\*</sup>, Yong Shuai <sup>b,\*</sup>, Zhongxiang Zhou <sup>a,c</sup>

a School of Physics, Harbin Institute of Technology, Harbin 150001, PR China

b School of Energy Science and Engineering, Harbin Institute of Technology, Harbin, 150001, PR China

c Heilongjiang Provincial Key Laboratory of Plasma Physics and Application Technology, Harbin Institute of Technology, Harbin 150001, PR China

† Contributed equally to this work

\* Corresponding authors: Yanqing Shen. E-mail: [shenyanqing2004@163.com](mailto:shenyanqing2004@163.com)

Qing Ai, E-mail: [hitaiqing@hit.edu.cn](mailto:hitaiqing@hit.edu.cn)

Yong Shuai, E-mail: [shuaiyong@hit.edu.cn](mailto:shuaiyong@hit.edu.cn)

The whole reaction process of the electrochemical reduction of  $\text{NO}_3^-$  to  $\text{NH}_3$  can be summarized as  $\text{NO}_3^- + 9\text{H}^+ + 8e^- \rightarrow \text{NH}_3 + 3\text{H}_2\text{O}$ . Nine protons and eight electrons are transferred in the process. The basic reaction steps of the N-end pathway are described as

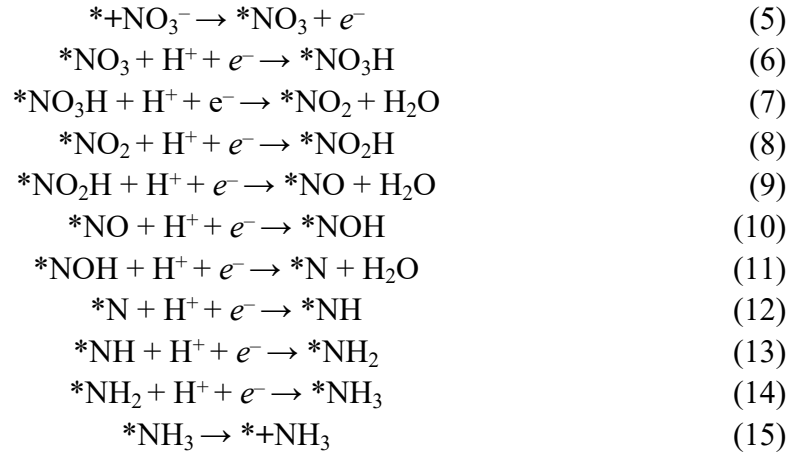

In addition, the production of NO, the production of  $\text{NO}_2$ , and the formation of NO dimers may lead to the production of byproduct  $\text{N}_2$  by a pathway that can be described as

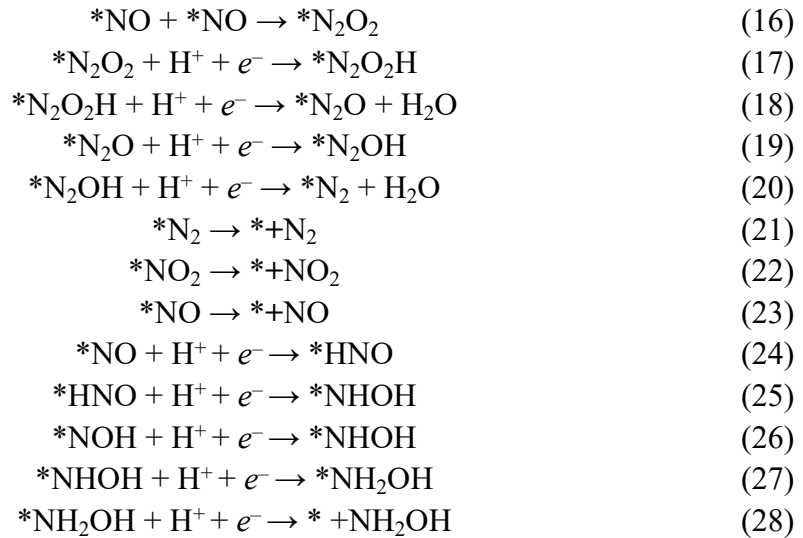

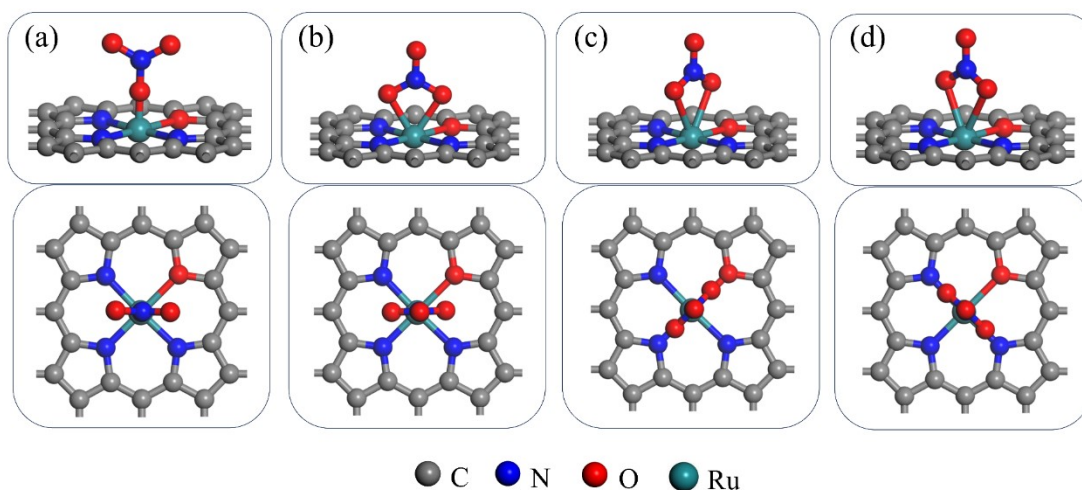

Figure S1. Four possible configurations of  $\text{NO}_3^-$ , namely, (a)1-O pattern (one oxygen atom adsorbed on TM- $\text{N}_3\text{X}$ ), (b)2-O pattern (two oxygen atoms adsorbed on TM- $\text{N}_3\text{X}$ ), (c)2-OO pattern (oxygen of  $\text{NO}_3^-$  closed to O of base), and (d)2-ON pattern (oxygen of  $\text{NO}_3^-$  closed to N of base). Ru- $\text{N}_3\text{O}$  is taken as a representative.

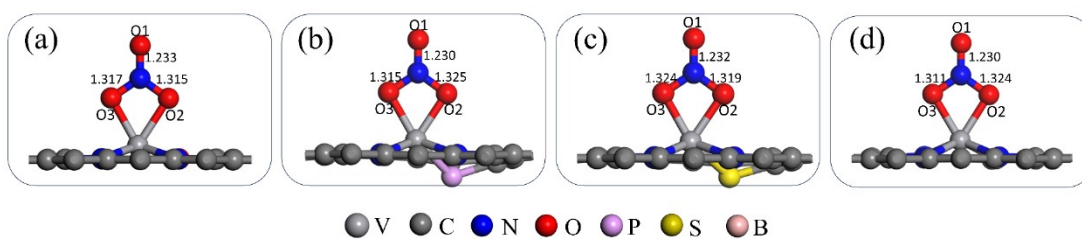

Figure S2. Taking V- $\text{N}_3\text{X}$  as an example, the N-O2 and N-O3 bond lengths of activated  $^*\text{NO}_3$  increased significantly from 1.264 Å in the gaseous state to 1.311 ~ 1.325 Å.

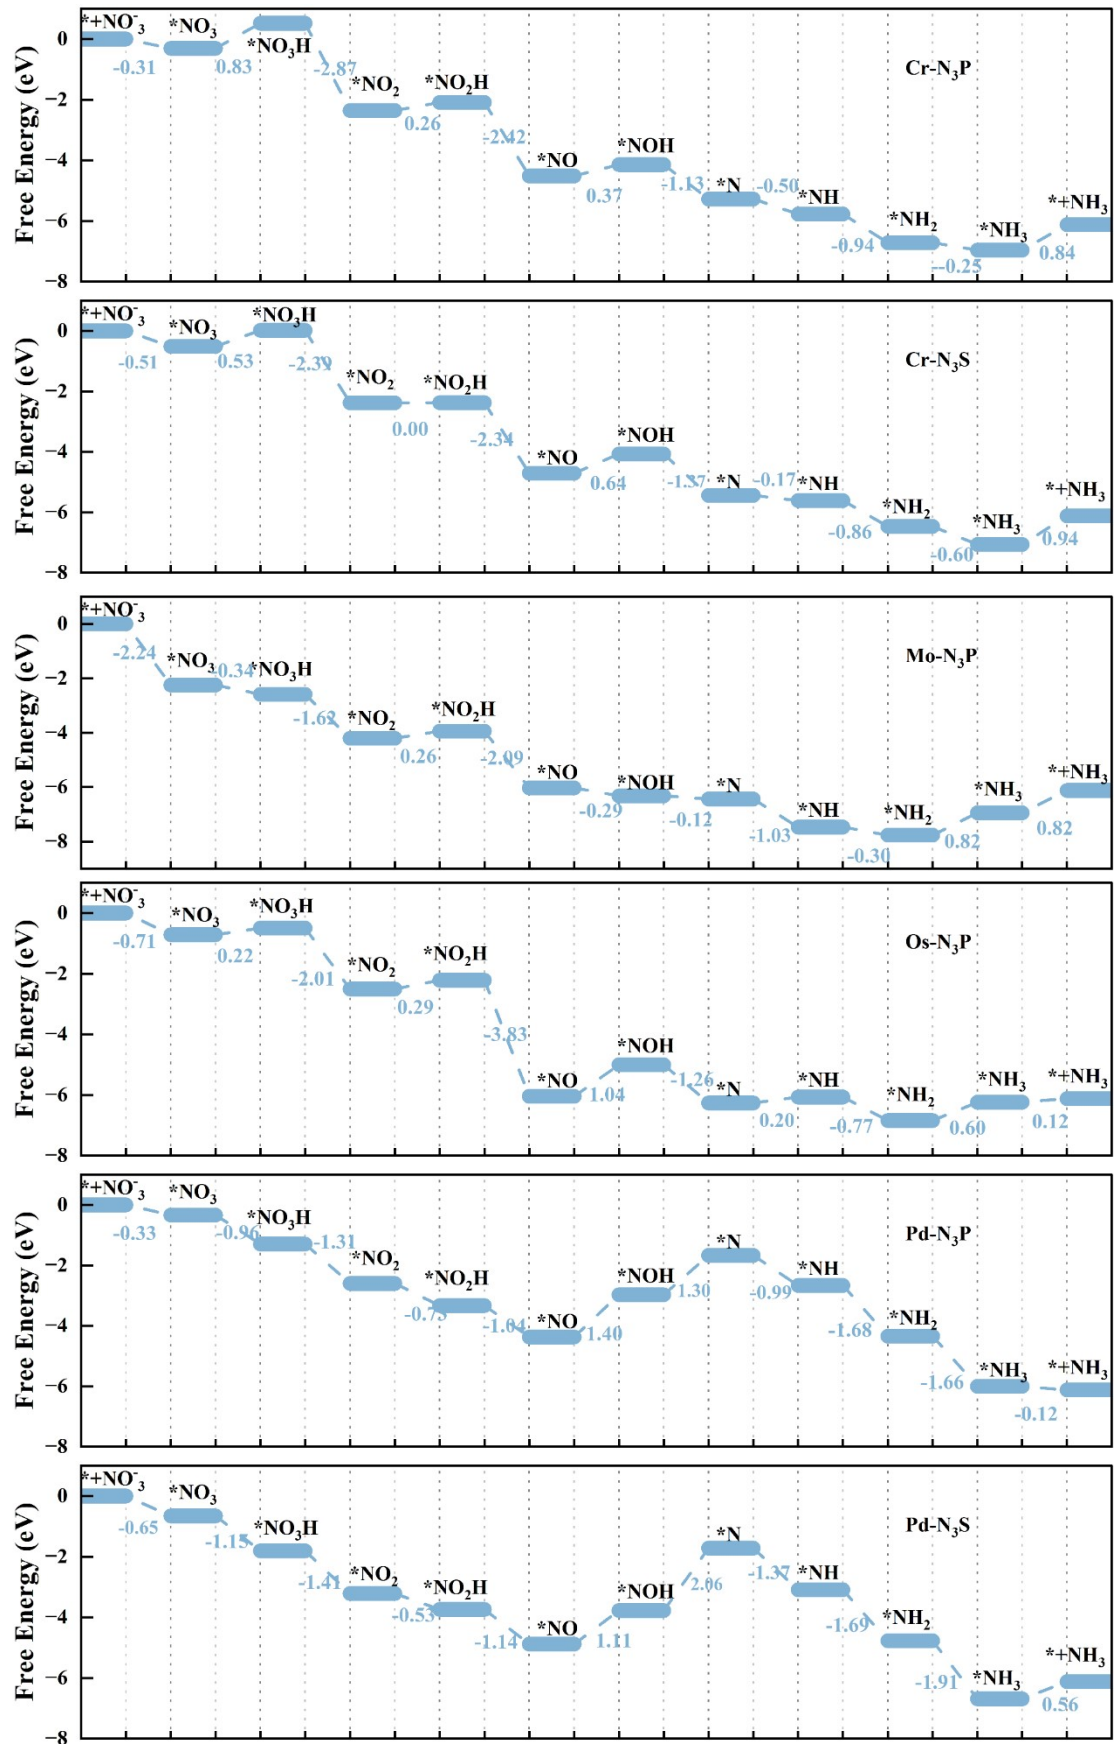

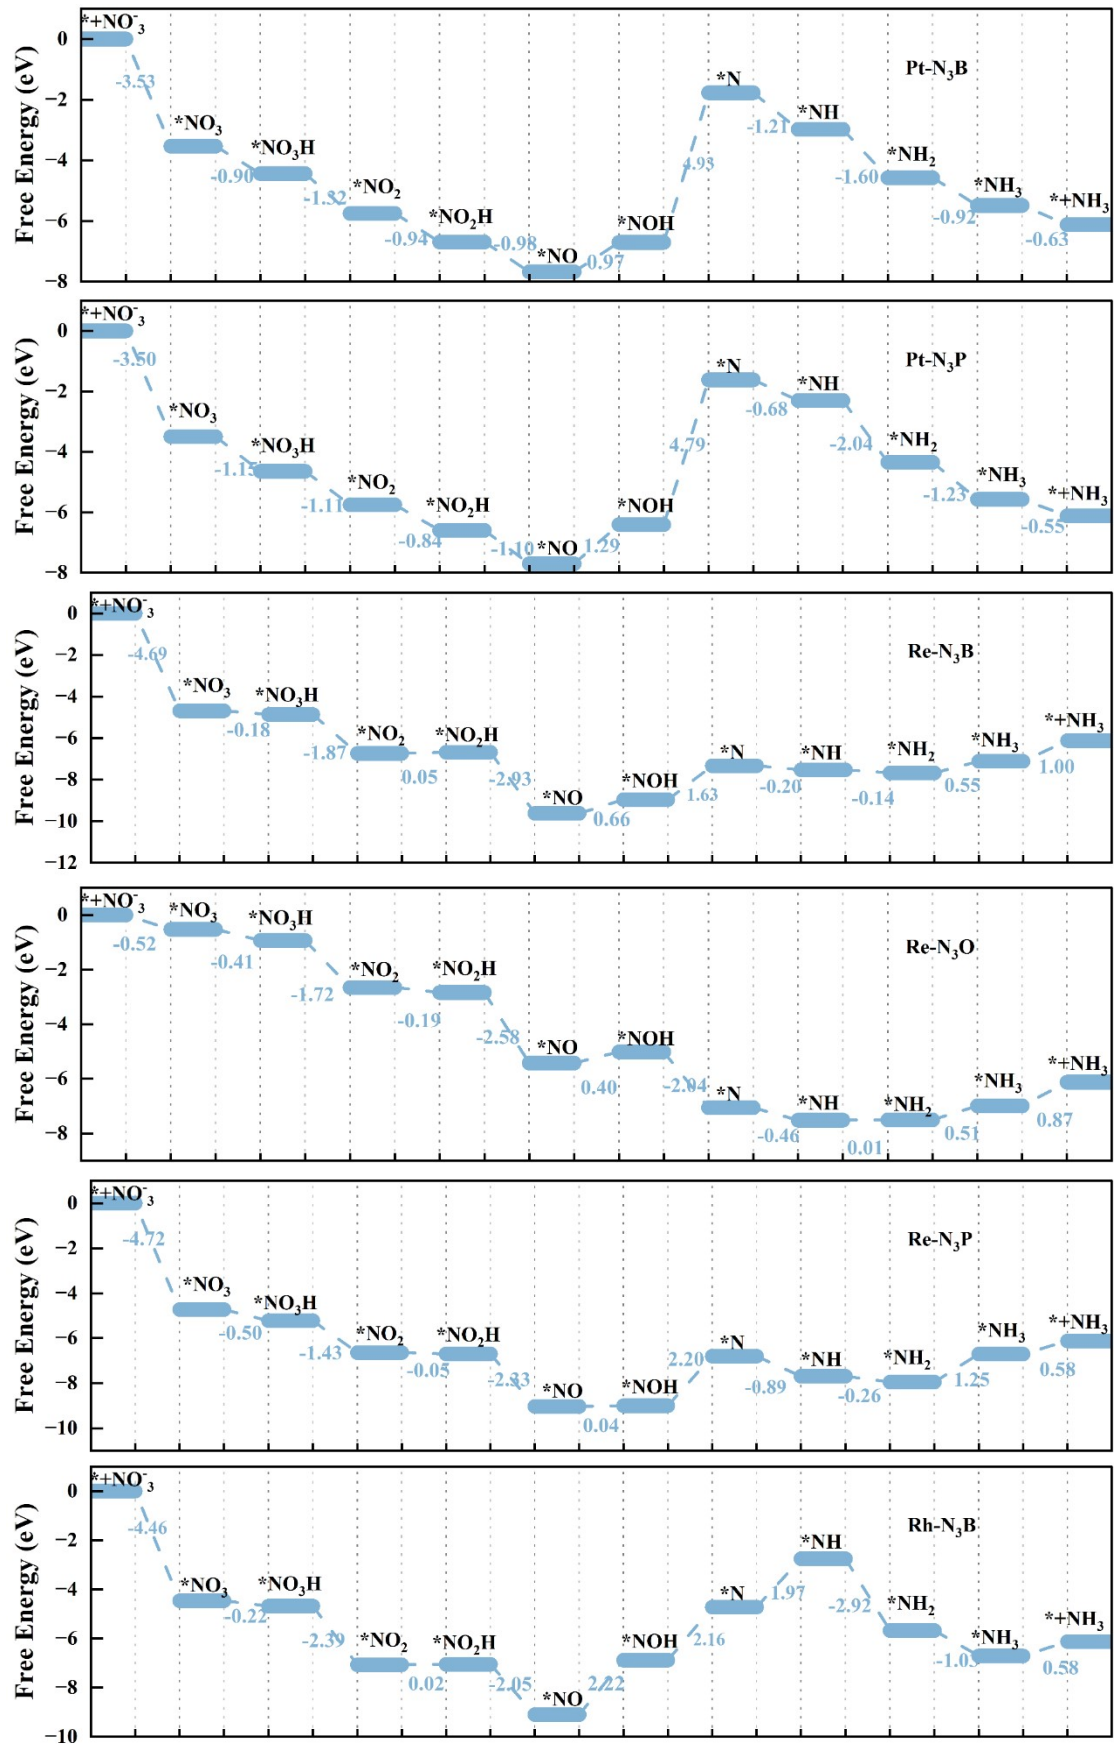

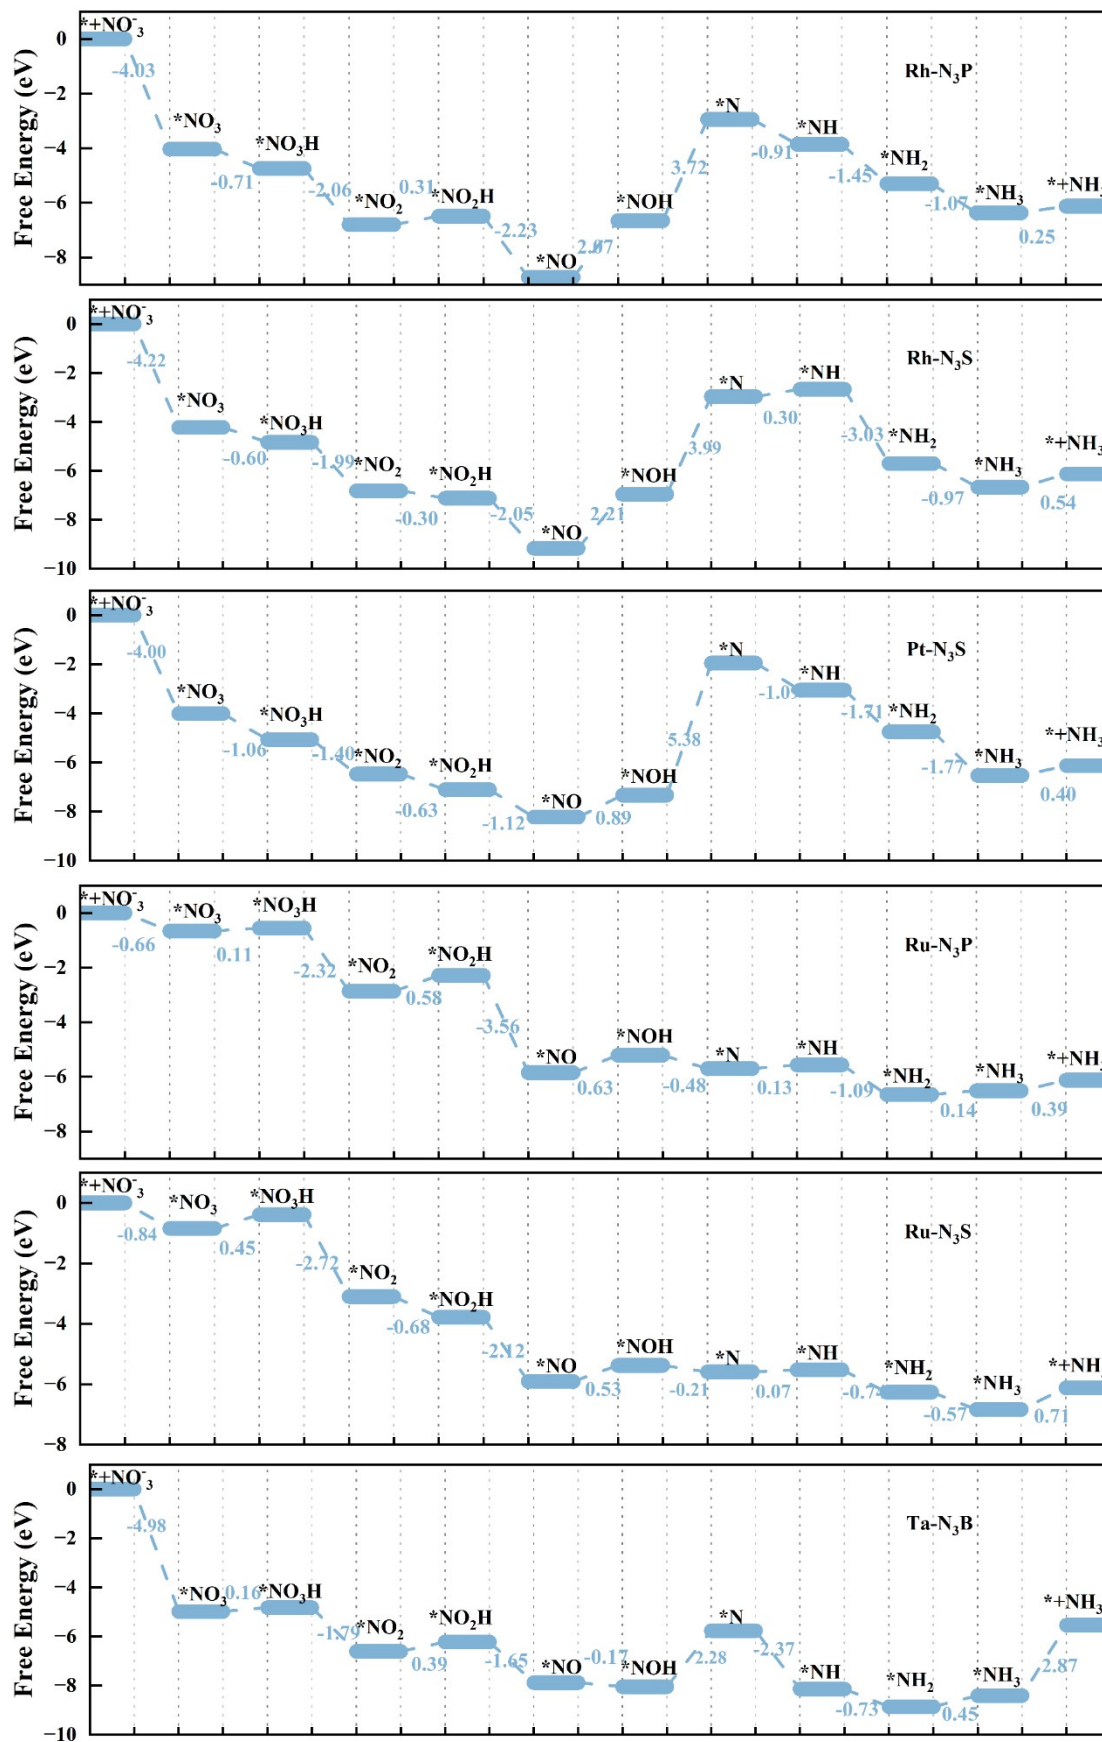



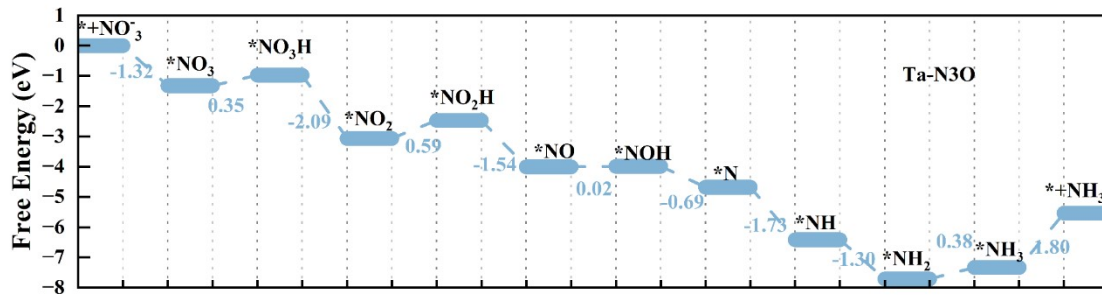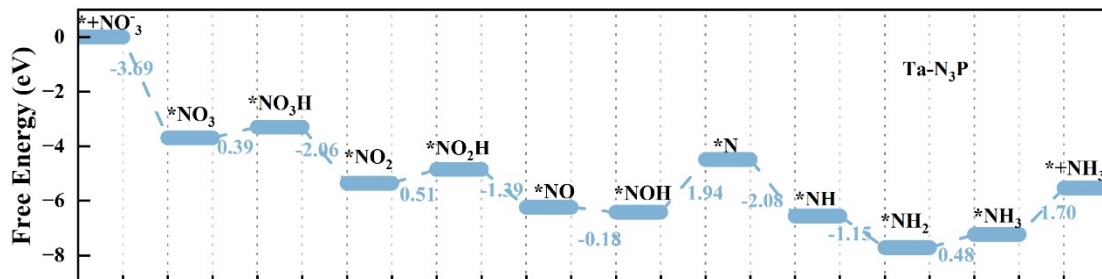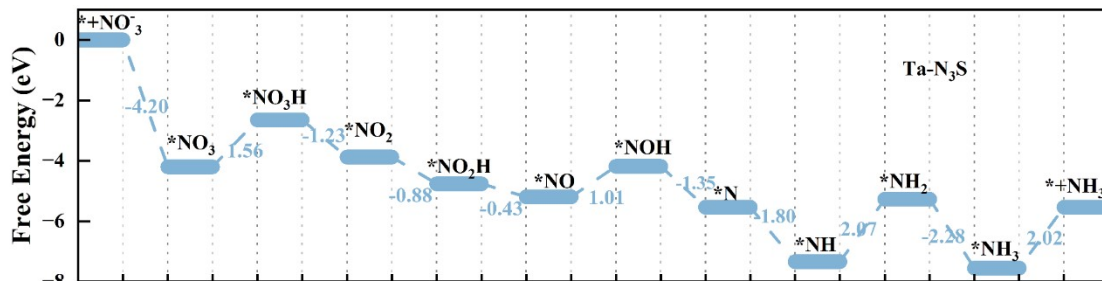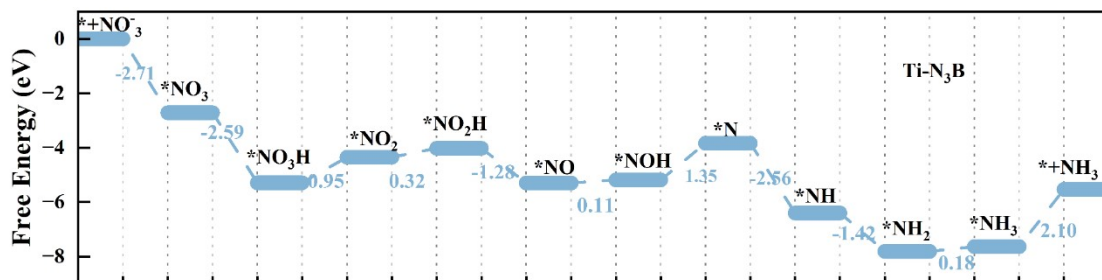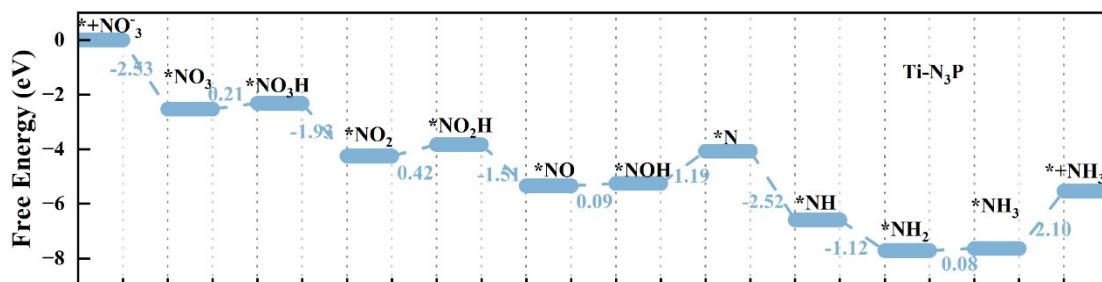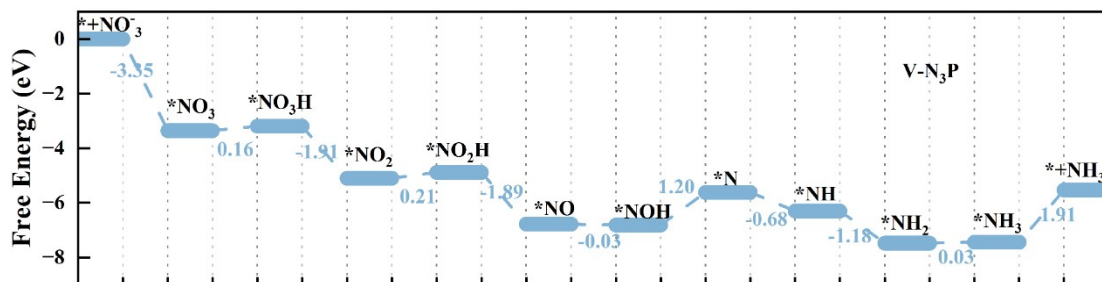

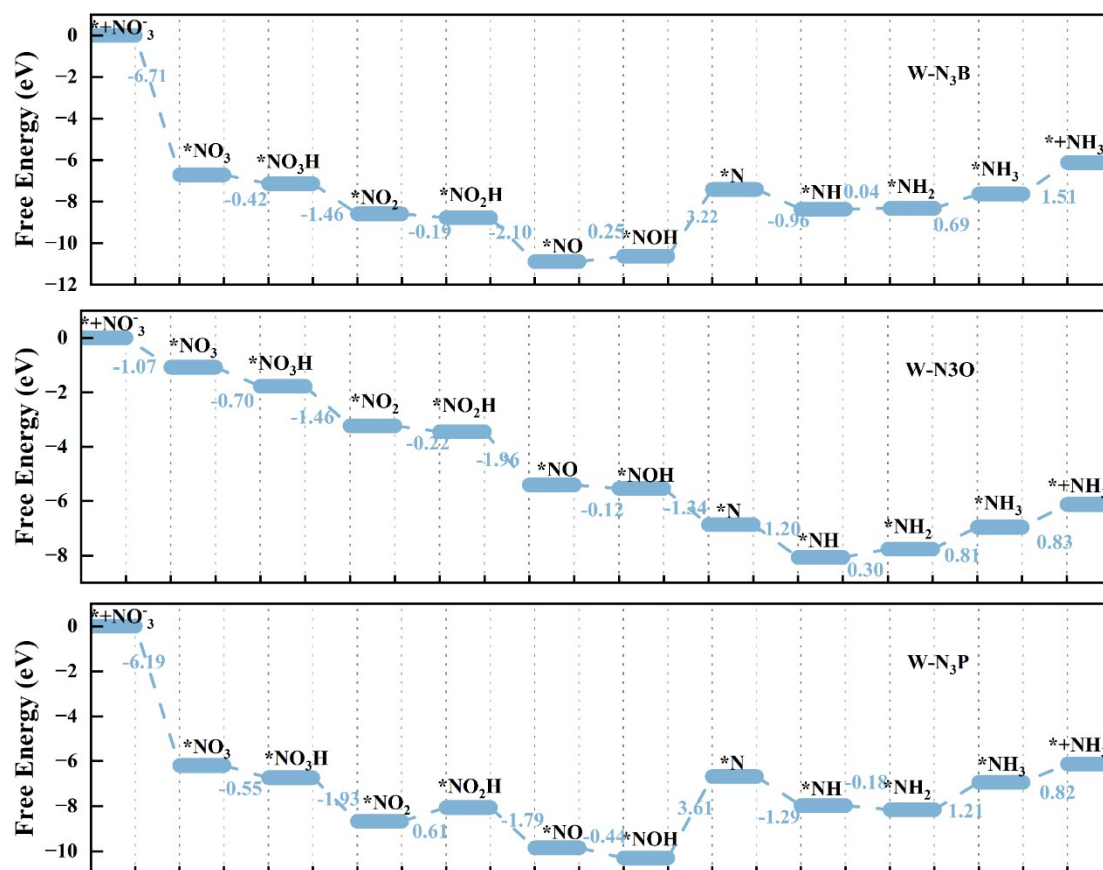

Figure S3. Gibbs Free energy diagrams of NO<sub>3</sub>RR on Ta-N<sub>3</sub>O, W-N<sub>3</sub>O, Re-N<sub>3</sub>O, Ti-N<sub>3</sub>P, V-N<sub>3</sub>P, Cr-N<sub>3</sub>P, Mo-N<sub>3</sub>P, Ru-N<sub>3</sub>P, Rh-N<sub>3</sub>P, Pd-N<sub>3</sub>P, Ta-N<sub>3</sub>P, W-N<sub>3</sub>P, Re-N<sub>3</sub>P, Os-N<sub>3</sub>P, Pt-N<sub>3</sub>P, Cr-N<sub>3</sub>S, Ru-N<sub>3</sub>S, Rh-N<sub>3</sub>S, Pd-N<sub>3</sub>S, Ta-N<sub>3</sub>S, Pt-N<sub>3</sub>S, Ti-N<sub>3</sub>B, Rh-N<sub>3</sub>B, Ta-N<sub>3</sub>B, W-N<sub>3</sub>B, Re-N<sub>3</sub>B, Pt-N<sub>3</sub>B.



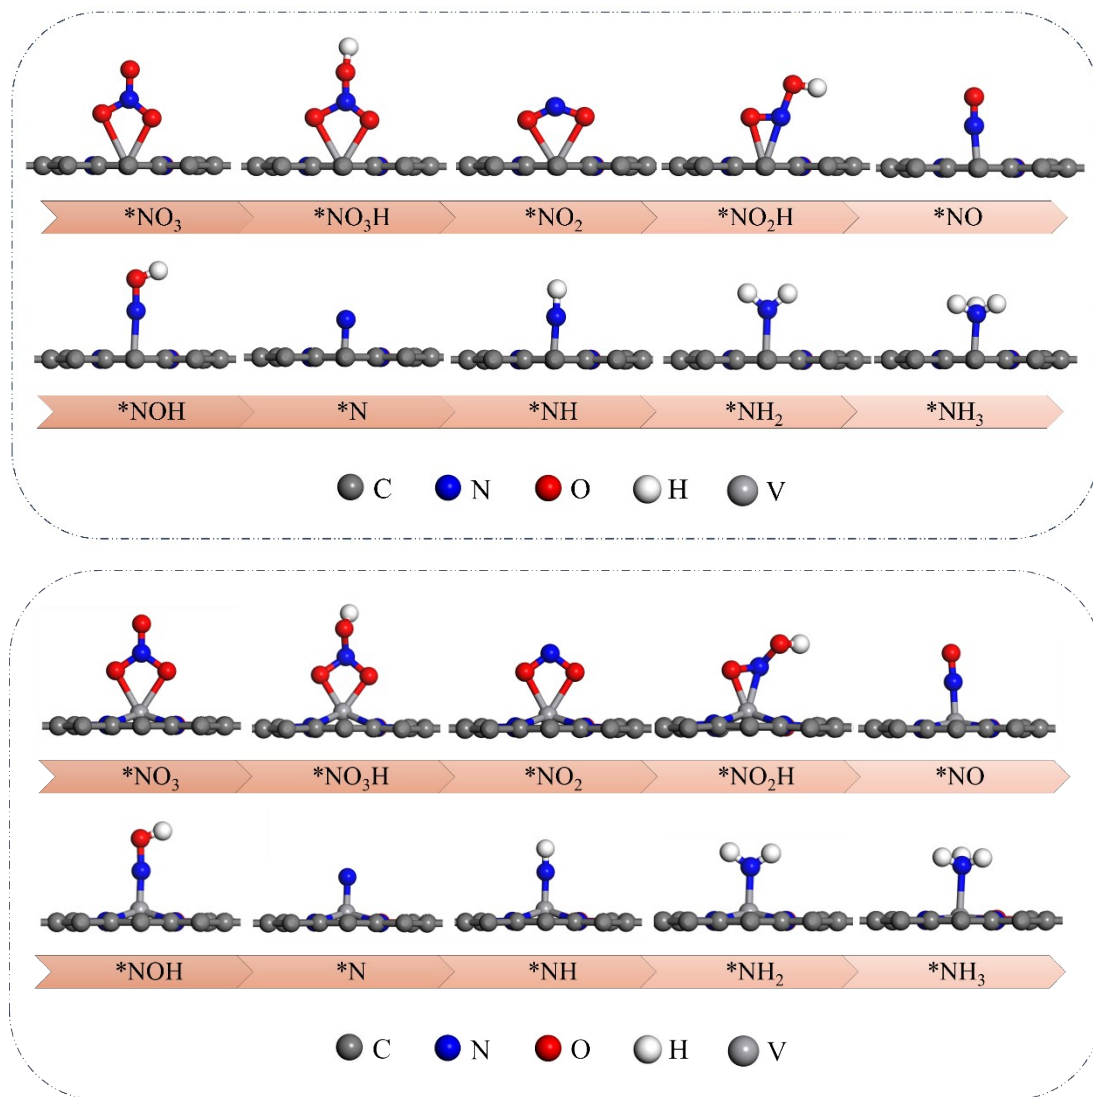

Figure S4. The changes of the adsorption configuration of V-N<sub>3</sub>O during the entire reaction process before and after optimization, the path from  $*NO_3^-$  to  $*NH$ .

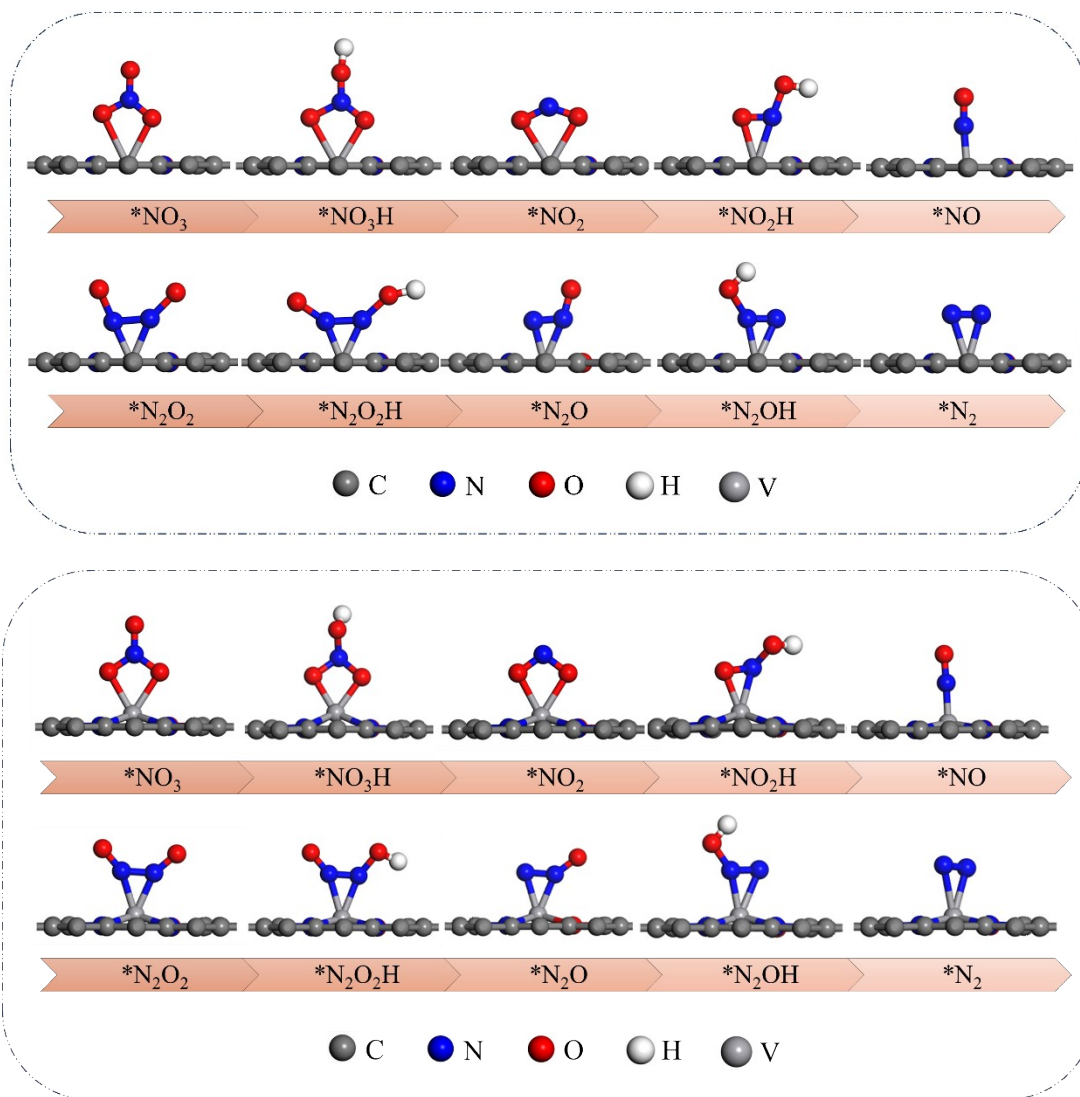

Figure S5. The changes of the adsorption configuration of V-N<sub>3</sub>O during the entire reaction process before and after optimization, the path from \*NO<sub>3</sub><sup>-</sup> to \*N<sub>2</sub>.

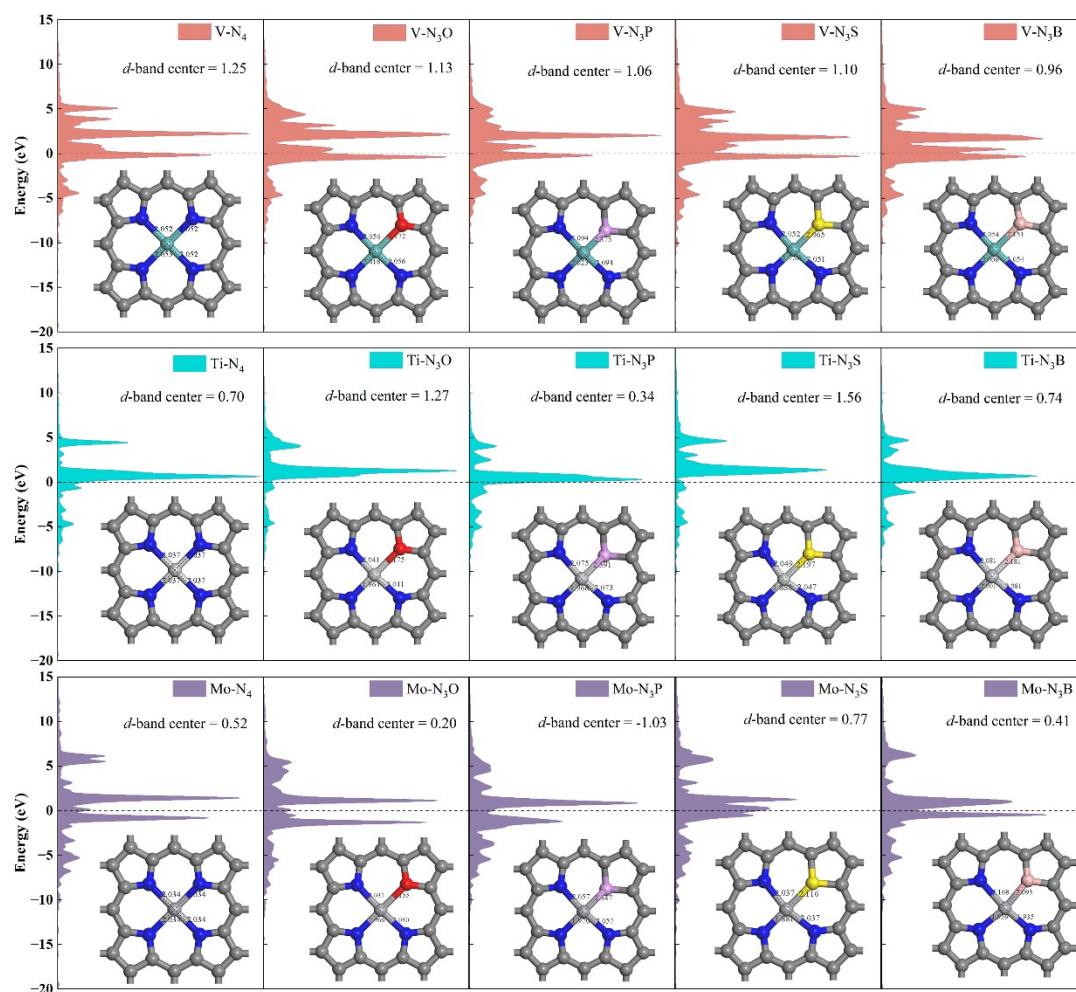

Figure S6. Changes in  $d$ -band center and bond length of V, Ti and Mo under different coordination environments.

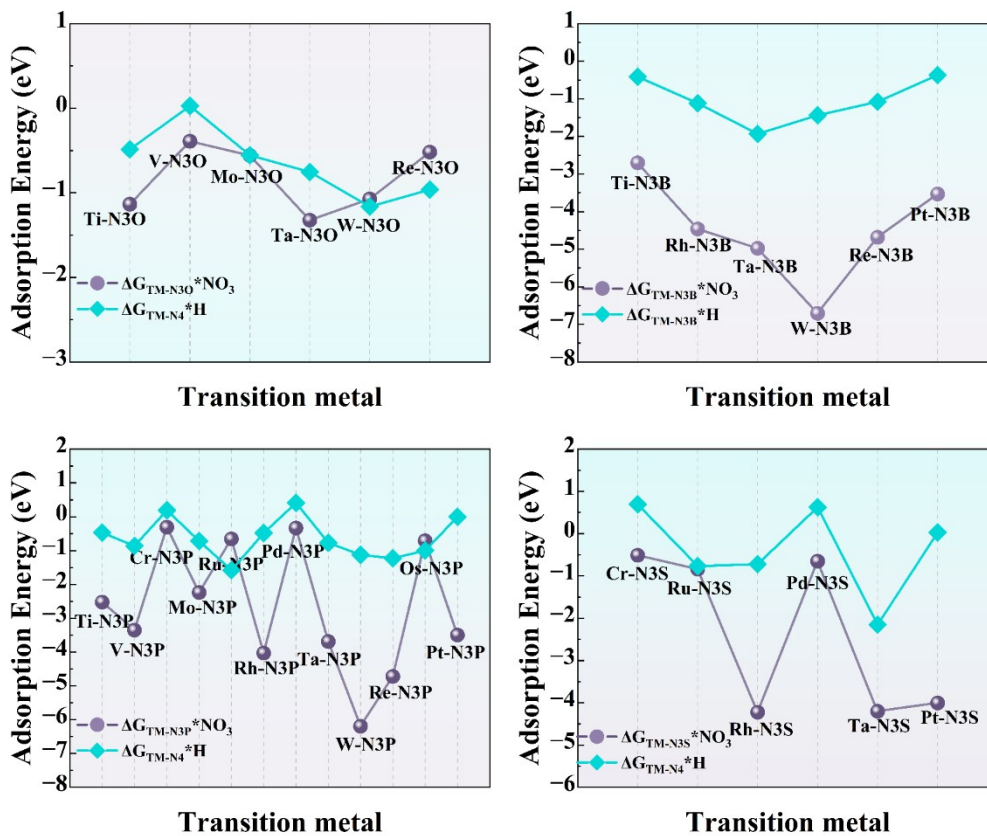

Figure S7. Adsorption energy of 30 TM-N<sub>3</sub>X catalysts for NO<sub>3</sub><sup>-</sup> and H<sup>+</sup> adsorption in corresponding modes.

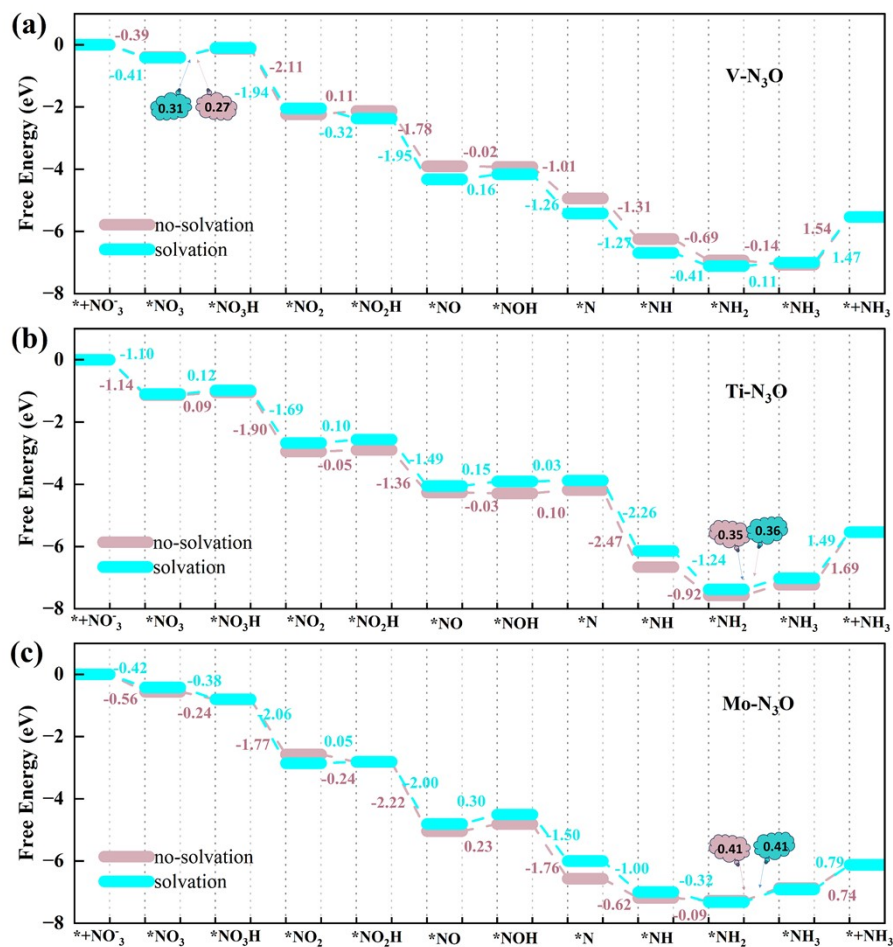

Figure S8. Free energy diagrams of NO<sub>3</sub>RR on (a) V-N<sub>3</sub>O, (b) Ti-N<sub>3</sub>O, (c) Mo-N<sub>3</sub>O.

Purple represents the result without considering the solvation effect, and blue represents the result with considering the solvation effect.

**Table S1.** The formation energy ( $E_{\text{form}}$ ) and dissolution potential ( $U_{\text{diss}}$ ) of 52 TM-N<sub>3</sub>X catalysts.

|                     | $E_{\text{form}}(\text{eV})$ | $U_{\text{diss}}(\text{V})$ |
|---------------------|------------------------------|-----------------------------|
| Ti-N <sub>3</sub> O | -3.66                        | 0.20                        |
| V-N <sub>3</sub> O  | -3.30                        | 0.47                        |
| Cr-N <sub>3</sub> O | -3.22                        | 0.70                        |
| Nb-N <sub>3</sub> O | -1.62                        | -0.56                       |
| Mo-N <sub>3</sub> O | -0.99                        | 0.13                        |
| Ru-N <sub>3</sub> O | -0.94                        | 0.93                        |
| Rh-N <sub>3</sub> O | -2.15                        | 1.68                        |
| Pd-N <sub>3</sub> O | -2.56                        | 2.23                        |
| Ta-N <sub>3</sub> O | -1.99                        | 0.06                        |
| W-N <sub>3</sub> O  | -0.41                        | 0.24                        |
| Re-N <sub>3</sub> O | -0.09                        | 0.33                        |
| Os-N <sub>3</sub> O | -0.14                        | 0.86                        |
| Pt-N <sub>3</sub> O | -2.34                        | 2.35                        |
| Ti-N <sub>3</sub> P | -4.46                        | 0.60                        |
| V-N <sub>3</sub> P  | -2.45                        | 0.04                        |
| Cr-N <sub>3</sub> P | -3.48                        | 0.83                        |
| Nb-N <sub>3</sub> P | -2.63                        | -0.22                       |
| Mo-N <sub>3</sub> P | -1.02                        | 0.14                        |
| Ru-N <sub>3</sub> P | -1.88                        | 1.40                        |
| Rh-N <sub>3</sub> P | -2.19                        | 1.70                        |
| Pd-N <sub>3</sub> P | -3.44                        | 2.67                        |
| Ta-N <sub>3</sub> P | -2.60                        | 0.27                        |
| W-N <sub>3</sub> P  | -0.25                        | 0.18                        |
| Re-N <sub>3</sub> P | -0.12                        | 0.34                        |
| Os-N <sub>3</sub> P | -1.52                        | 1.03                        |
| Pt-N <sub>3</sub> P | -2.67                        | 2.52                        |
| Ti-N <sub>3</sub> S | -3.15                        | -0.06                       |
| V-N <sub>3</sub> S  | -1.85                        | -0.25                       |
| Cr-N <sub>3</sub> S | -2.96                        | 0.57                        |
| Nb-N <sub>3</sub> S | -1.49                        | -0.60                       |
| Mo-N <sub>3</sub> S | 0.35                         | -0.32                       |
| Ru-N <sub>3</sub> S | -1.28                        | 1.10                        |
| Rh-N <sub>3</sub> S | -1.25                        | 1.23                        |
| Pd-N <sub>3</sub> S | -2.93                        | 2.42                        |
| Ta-N <sub>3</sub> S | -1.96                        | 0.05                        |
| W-N <sub>3</sub> S  | 1.12                         | -0.27                       |
| Re-N <sub>3</sub> S | 0.70                         | 0.07                        |
| Os-N <sub>3</sub> S | 0.20                         | 0.81                        |
| Pt-N <sub>3</sub> S | -2.07                        | 2.21                        |



---

|                     |       |       |
|---------------------|-------|-------|
| Ti-N <sub>3</sub> B | -4.52 | 0.63  |
| V-N <sub>3</sub> B  | -2.04 | -0.16 |
| Cr-N <sub>3</sub> B | -3.49 | 0.84  |
| Nb-N <sub>3</sub> B | -1.78 | -0.51 |
| Mo-N <sub>3</sub> B | 0.07  | -0.22 |
| Ru-N <sub>3</sub> B | -1.73 | 1.32  |
| Rh-N <sub>3</sub> B | -2.45 | 1.83  |
| Pd-N <sub>3</sub> B | -4.24 | 3.07  |
| Ta-N <sub>3</sub> B | -2.73 | 0.31  |
| W-N <sub>3</sub> B  | -0.22 | 0.17  |
| Re-N <sub>3</sub> B | -0.56 | 0.49  |
| Os-N <sub>3</sub> B | -1.24 | 1.00  |
| Pt-N <sub>3</sub> B | -3.64 | 3.00  |

---

**Table S2.** The adsorption energies of all 40 TM-N<sub>3</sub>X for NO<sub>3</sub><sup>-</sup> adsorption.

|                     | $\Delta G^*NO_3$ |                     | $\Delta G^*NO_3$ |
|---------------------|------------------|---------------------|------------------|
| Ti-N <sub>3</sub> O | -1.14            | Ti-N <sub>3</sub> P | -2.53            |
| V-N <sub>3</sub> O  | -0.39            | V-N <sub>3</sub> P  | -3.35            |
| Cr-N <sub>3</sub> O | 0.64             | Cr-N <sub>3</sub> P | -0.31            |
| Mo-N <sub>3</sub> O | -0.56            | Mo-N <sub>3</sub> P | -2.24            |
| Ru-N <sub>3</sub> O | 0.76             | Ru-N <sub>3</sub> P | -0.66            |
| Rh-N <sub>3</sub> O | 1.24             | Rh-N <sub>3</sub> P | -4.03            |
| Pd-N <sub>3</sub> O | 1.87             | Pd-N <sub>3</sub> P | -0.33            |
| Ta-N <sub>3</sub> O | -1.32            | Ta-N <sub>3</sub> P | -3.69            |
| W-N <sub>3</sub> O  | -1.07            | W-N <sub>3</sub> P  | -6.19            |
| Re-N <sub>3</sub> O | -0.52            | Re-N <sub>3</sub> P | -4.72            |
| Os-N <sub>3</sub> O | 0.93             | Os-N <sub>3</sub> P | -0.71            |
| Pt-N <sub>3</sub> O | 2.02             | Pt-N <sub>3</sub> P | -3.50            |
| Ti-N <sub>3</sub> B | -2.71            | Cr-N <sub>3</sub> S | -0.51            |
| Cr-N <sub>3</sub> B | -0.73            | Ru-N <sub>3</sub> S | -0.84            |
| Ru-N <sub>3</sub> B | -1.59            | Rh-N <sub>3</sub> S | -4.22            |
| Rh-N <sub>3</sub> B | -4.46            | Pd-N <sub>3</sub> S | -0.65            |
| Pd-N <sub>3</sub> B | -0.37            | Ta-N <sub>3</sub> S | -4.20            |
| Ta-N <sub>3</sub> B | -4.98            | Pt-N <sub>3</sub> S | -4.00            |
| W-N <sub>3</sub> B  | -6.71            |                     |                  |
| Re-N <sub>3</sub> B | -4.69            |                     |                  |
| Os-N <sub>3</sub> B | -1.85            |                     |                  |
| Pt-N <sub>3</sub> B | -3.53            |                     |                  |

**Table S3.** Gibbs free energy variation in the reaction process (step 1 to 6) of TM-N<sub>3</sub>O systems,  $\Delta G$ -n representing the gibbs free energy change in the n-step (n = 1 to 6), corresponding to equation S5 to S10.

|                     | $\Delta G$ -1 | $\Delta G$ -2 | $\Delta G$ -3 | $\Delta G$ -4 | $\Delta G$ -5 | $\Delta G$ -6 |
|---------------------|---------------|---------------|---------------|---------------|---------------|---------------|
|                     | -1.14         | 0.09          | -1.90         | 0.05          | -1.36         | -0.02         |
| V-N <sub>3</sub> O  | -0.39         | 0.27          | -2.11         | 0.11          | -1.78         | -0.02         |
| Mo-N <sub>3</sub> O | -0.56         | -0.24         | -1.77         | -0.24         | -2.22         | 0.23          |
| Ta-N <sub>3</sub> O | -1.32         | 0.35          | -2.09         | 0.59          | -1.54         | 0.02          |
| W-N <sub>3</sub> O  | -1.07         | -0.70         | -1.46         | -0.22         | -1.96         | -0.12         |
| Re-N <sub>3</sub> O | -0.52         | -0.41         | -1.72         | -0.19         | -2.58         | 0.40          |

**Table S4.** Gibbs free energy variation in the reaction process (step 7 to 11) of TM-N<sub>3</sub>O systems,  $\Delta G$ -n representing the gibbs free energy change in the n-step (n = 7 to 11), corresponding to equation S11 to S15.

|                     | $\Delta G$ -7 | $\Delta G$ -8 | $\Delta G$ -9 | $\Delta G$ -10 | $\Delta G$ -11 |
|---------------------|---------------|---------------|---------------|----------------|----------------|
| Ti-N <sub>3</sub> O | 0.10          | 1.37          | -2.47         | -0.92          | 0.35           |
| V-N <sub>3</sub> O  | -1.01         | 1.25          | -1.31         | -0.69          | -0.14          |
| Mo-N <sub>3</sub> O | -1.76         | -0.17         | -0.62         | -0.09          | 0.41           |
| Ta-N <sub>3</sub> O | -0.69         | 1.56          | -1.73         | -1.30          | 0.38           |
| W-N <sub>3</sub> O  | -1.34         | 3.70          | -1.20         | 0.30           | 0.81           |
| Re-N <sub>3</sub> O | -2.04         | 1.93          | -0.46         | 0.01           | 0.51           |

**Table S5.** Gibbs free energy variation in the reaction process (step 1 to 6) of TM-N<sub>3</sub>P systems,  $\Delta G$ -n representing the gibbs free energy change in the n-step (n = 1 to 6), corresponding to equation S5 to S10.

|                     | $\Delta G$ -1 | $\Delta G$ -2 | $\Delta G$ -3 | $\Delta G$ -4 | $\Delta G$ -5 | $\Delta G$ -6 |
|---------------------|---------------|---------------|---------------|---------------|---------------|---------------|
| Ti-N <sub>3</sub> P | -2.53         | 0.21          | -1.93         | 0.42          | -1.51         | 0.09          |
| V-N <sub>3</sub> P  | -3.35         | 0.16          | -1.91         | 0.21          | -1.89         | -0.03         |
| Cr-N <sub>3</sub> P | -0.31         | 0.83          | -2.87         | 0.26          | -2.42         | 0.37          |
| Mo-N <sub>3</sub> P | -2.24         | -0.34         | -1.62         | 0.26          | -2.09         | -0.29         |
| Ru-N <sub>3</sub> P | -0.66         | 0.11          | -2.32         | 0.58          | -3.56         | 0.63          |
| Rh-N <sub>3</sub> P | -4.03         | -0.71         | -2.06         | 0.31          | -2.23         | 2.07          |
| Pd-N <sub>3</sub> P | -0.33         | -0.96         | -1.31         | -0.73         | -1.04         | 1.40          |
| Ta-N <sub>3</sub> P | -3.69         | 0.39          | -2.06         | 0.51          | -1.39         | -0.18         |
| W-N <sub>3</sub> P  | -6.19         | -0.55         | -1.93         | 0.61          | -1.79         | -0.44         |
| Re-N <sub>3</sub> P | -4.72         | -0.50         | -1.43         | -0.05         | -2.33         | 0.04          |
| Os-N <sub>3</sub> P | -0.71         | 0.22          | -2.01         | 0.29          | -3.83         | 1.04          |
| Pt-N <sub>3</sub> P | -3.50         | -1.15         | -1.11         | -0.84         | -1.10         | 1.29          |

**Table S6.** Gibbs free energy variation in the reaction process (step 7 to 11) of TM-N<sub>3</sub>P systems,  $\Delta G$ -n representing the gibbs free energy change in the n-step (n = 7 to 11), corresponding to equation S11 to S15.

|                     | $\Delta G$ -7 | $\Delta G$ -8 | $\Delta G$ -9 | $\Delta G$ -10 | $\Delta G$ -11 |
|---------------------|---------------|---------------|---------------|----------------|----------------|
| Ti-N <sub>3</sub> P | 1.19          | 1.37          | -2.52         | -1.12          | 0.08           |

|                     |       |       |       |       |       |
|---------------------|-------|-------|-------|-------|-------|
| V-N <sub>3</sub> P  | 1.20  | -0.68 | -1.18 | 0.03  | 1.91  |
| Cr-N <sub>3</sub> P | -1.13 | -1.56 | -0.50 | -0.94 | -0.25 |
| Mo-N <sub>3</sub> P | -0.12 | -0.17 | -1.03 | -0.30 | 0.82  |
| Ru-N <sub>3</sub> P | -0.48 | -0.10 | 0.13  | -1.09 | 0.14  |
| Rh-N <sub>3</sub> P | 3.72  | 4.12  | -0.91 | -1.45 | -1.07 |
| Pd-N <sub>3</sub> P | 1.30  | 2.34  | -0.99 | -1.68 | -1.66 |
| Ta-N <sub>3</sub> P | 1.94  | 1.56  | -2.08 | -1.15 | 0.48  |
| W-N <sub>3</sub> P  | 3.61  | 3.70  | -1.29 | -0.18 | 1.21  |
| Re-N <sub>3</sub> P | 2.20  | 1.93  | -0.89 | -0.26 | 1.25  |
| Os-N <sub>3</sub> P | -1.26 | -0.66 | 0.20  | -0.77 | 0.60  |
| Pt-N <sub>3</sub> P | 4.79  | -0.68 | -2.04 | -1.23 | -0.55 |

**Table S7.** Gibbs free energy variation in the reaction process (step 1 to 6) of TM-N<sub>3</sub>S systems,  $\Delta G$ -n representing the gibbs free energy change in the n-step (n = 1 to 6), corresponding to equation S5 to S10.

|                     | $\Delta G$ -1 | $\Delta G$ -2 | $\Delta G$ -3 | $\Delta G$ -4 | $\Delta G$ -5 | $\Delta G$ -6 |
|---------------------|---------------|---------------|---------------|---------------|---------------|---------------|
| Cr-N <sub>3</sub> S | -0.51         | 0.53          | -2.39         | 0.00          | -2.34         | 0.64          |
| Ru-N <sub>3</sub> S | -0.84         | 0.45          | -2.72         | -0.68         | -2.12         | 0.53          |
| Rh-N <sub>3</sub> S | -4.22         | -0.60         | -1.99         | -0.30         | -2.05         | 2.21          |
| Pd-N <sub>3</sub> S | -0.65         | -1.15         | -1.41         | -0.53         | -1.14         | 1.11          |
| Ta-N <sub>3</sub> S | -4.20         | 1.56          | -1.23         | -0.88         | -0.43         | 1.01          |
| Pt-N <sub>3</sub> S | -4.00         | -1.06         | -1.40         | -0.63         | -1.12         | 0.89          |

**Table S8.** Gibbs free energy variation in the reaction process (step 7 to 11) of TM-N<sub>3</sub>S systems,  $\Delta G$ -n representing the gibbs free energy change in the n-step (n = 7 to 11), corresponding to equation S11 to S15.

|                     | $\Delta G$ -7 | $\Delta G$ -8 | $\Delta G$ -9 | $\Delta G$ -10 | $\Delta G$ -11 |
|---------------------|---------------|---------------|---------------|----------------|----------------|
| Cr-N <sub>3</sub> S | -1.37         | -1.56         | -0.17         | -0.86          | -0.60          |
| Ru-N <sub>3</sub> S | -0.21         | -0.10         | 0.07          | -0.74          | -0.57          |
| Rh-N <sub>3</sub> S | 3.99          | 4.12          | 0.30          | -3.03          | -0.97          |
| Pd-N <sub>3</sub> S | 2.06          | 2.34          | -1.37         | -1.69          | -1.91          |
| Ta-N <sub>3</sub> S | -1.35         | 1.56          | -1.80         | 2.07           | -2.28          |
| Pt-N <sub>3</sub> S | 5.38          | 5.59          | -1.09         | -1.71          | -1.77          |

**Table S9.** Gibbs free energy variation in the reaction process (step 1 to 6) of TM-N<sub>3</sub>B systems,  $\Delta G$ -n representing the gibbs free energy change in the n-step (n = 1 to 6), corresponding to equation S5 to S10.

|                     | $\Delta G$ -1 | $\Delta G$ -2 | $\Delta G$ -3 | $\Delta G$ -4 | $\Delta G$ -5 | $\Delta G$ -6 |
|---------------------|---------------|---------------|---------------|---------------|---------------|---------------|
| Cr-N <sub>3</sub> B | -2.71         | -2.59         | 0.95          | 0.32          | -1.28         | 0.11          |
| Ru-N <sub>3</sub> B | -4.46         | -0.22         | -2.39         | 0.02          | -2.05         | 2.22          |
| Rh-N <sub>3</sub> B | -4.98         | 0.16          | -1.79         | 0.39          | -1.65         | -0.17         |
| Pd-N <sub>3</sub> B | -6.71         | -0.42         | -1.46         | -0.19         | -2.10         | 0.25          |
| Ta-N <sub>3</sub> B | -4.69         | -0.18         | -1.87         | 0.05          | -2.93         | 0.66          |
| Pt-N <sub>3</sub> B | -3.53         | -0.90         | -1.32         | -0.94         | -0.98         | 0.97          |



**Table S10.** Gibbs free energy variation in the reaction process (step 7 to 11) of TM-N<sub>3</sub>B systems,  $\Delta G$ -n representing the Gibbs free energy change in the n-step (n = 7 to 11), corresponding to equation S11 to S15.

|                     | $\Delta G$ -7 | $\Delta G$ -8 | $\Delta G$ -9 | $\Delta G$ -10 | $\Delta G$ -11 |
|---------------------|---------------|---------------|---------------|----------------|----------------|
| Cr-N <sub>3</sub> B | 1.35          | 1.37          | -2.56         | -1.42          | 0.18           |
| Ru-N <sub>3</sub> B | 2.16          | 4.12          | 1.97          | -2.92          | -1.03          |
| Rh-N <sub>3</sub> B | 2.28          | 1.56          | -2.37         | -0.73          | 0.45           |
| Pd-N <sub>3</sub> B | 3.22          | 3.70          | -0.96         | 0.04           | 0.69           |
| Ta-N <sub>3</sub> B | 1.63          | 1.93          | -0.20         | -0.14          | 0.55           |
| Pt-N <sub>3</sub> B | 4.93          | 5.59          | -1.21         | -1.60          | -0.92          |

**Table S11.** The Mulliken population for \*NOH → \*N and \*NO<sub>2</sub>H → \*NO.

|        | *NO <sub>2</sub> H(N-O) | length  | *NO(N-O) | length  | *NOH(N-O) | length  |
|--------|-------------------------|---------|----------|---------|-----------|---------|
| Ti-N3O | 0.29                    | 1.46249 | 0.75     | 1.22731 | 0.42      | 1.36359 |
| V-N3O  | 0.29                    | 1.45233 | 0.77     | 1.22587 | 0.44      | 1.35335 |
| Mo-N3O | 0.3                     | 1.45875 | 0.79     | 1.23142 | 0.45      | 1.35275 |
| Ta-N3O | 0.35                    | 1.38593 | 0.71     | 1.23589 | 0.43      | 1.36294 |
| W-N3O  | 0.31                    | 1.46037 | 0.77     | 1.23648 | 0.45      | 1.35347 |
| Re-N3O | 0.28                    | 1.46916 | 0.8      | 1.2295  | 0.46      | 1.34665 |
| Ti-N3P | 0.37                    | 1.38824 | 0.75     | 1.2262  | 0.42      | 1.36473 |
| V-N3P  | 0.37                    | 1.38413 | 0.78     | 1.22677 | 0.44      | 1.35446 |

---

|        |      |         |      |         |      |         |
|--------|------|---------|------|---------|------|---------|
| Cr-N3P | 0.31 | 1.42179 | 0.82 | 1.22229 | 0.45 | 1.34995 |
| Mo-N3P | 0.35 | 1.40714 | 0.77 | 1.23348 | 0.42 | 1.36986 |
| Ru-N3P | 0.28 | 1.41268 | 0.83 | 1.21649 | 0.41 | 1.37807 |
| Rh-N3P | 0.27 | 1.42627 | 0.79 | 1.20855 | 0.35 | 1.35671 |
| Pd-N3P | 0.27 | 1.43721 | 0.75 | 1.20228 | 0.36 | 1.33946 |
| Ta-N3P | 0.35 | 1.39237 | 0.72 | 1.23444 | 0.39 | 1.38155 |
| W-N3P  | 0.32 | 1.44151 | 0.75 | 1.23714 | 0.42 | 1.37093 |
| Re-N3P | 0.37 | 1.42014 | 0.8  | 1.22477 | 0.44 | 1.37638 |
| Os-N3P | 0.25 | 1.43388 | 0.82 | 1.22125 | 0.43 | 1.35236 |
| Pt-N3P | 0.26 | 1.44334 | 0.77 | 1.20564 | 0.32 | 1.3556  |
| Cr-N3S | 0.34 | 1.44943 | 0.82 | 1.223   | 0.46 | 1.34921 |
| Ru-N3S | 0.37 | 1.4419  | 0.84 | 1.21282 | 0.41 | 1.37674 |
| Rh-N3S | 0.31 | 1.4449  | 0.8  | 1.20645 | 0.35 | 1.35213 |
| Pd-N3S | 0.27 | 1.43102 | 0.74 | 1.20402 | 0.35 | 1.34966 |
| Ta-N3S | 0.25 | 1.45992 | 0.68 | 1.20031 | 0.38 | 1.32335 |
| Pt-N3S | 0.26 | 1.42515 | 0.73 | 1.2042  | 0.34 | 1.35291 |
| Ti-N3B | 0.37 | 1.3891  | 0.74 | 1.22452 | 0.42 | 1.36473 |
| Rh-N3B | 0.3  | 1.45488 | 0.78 | 1.21189 | 0.34 | 1.35673 |
| Ta-N3B | 0.35 | 1.39494 | 0.74 | 1.22955 | 0.42 | 1.36799 |
| W-N3B  | 0.38 | 1.40266 | 0.79 | 1.2312  | 0.44 | 1.35985 |
| Re-N3B | 0.37 | 1.42147 | 0.81 | 1.22742 | 0.44 | 1.35477 |
| Pt-N3B | 0.27 | 1.44347 | 0.78 | 1.19832 | 0.34 | 1.35129 |

---

**Table S12.** The limiting potentials( $U_L$ ) of 30 TM-PP catalysts are listed. The  $U_L$  is defined by  $U_L = -(\Delta G_{\max} / e)$ .

| Limiting Potentials |       | Limiting Potentials |       |
|---------------------|-------|---------------------|-------|
| Ti-N <sub>3</sub> O | -0.35 | Ti-N <sub>3</sub> P | -1.19 |
| V-N <sub>3</sub> O  | -0.27 | V-N <sub>3</sub> P  | -1.20 |
| Mo-N <sub>3</sub> O | -0.41 | Cr-N <sub>3</sub> P | -0.83 |
| Ta-N <sub>3</sub> O | -0.59 | Mo-N <sub>3</sub> P | -0.82 |
| W-N <sub>3</sub> O  | -0.81 | Ru-N <sub>3</sub> P | -0.63 |
| Re-N <sub>3</sub> O | -0.51 | Rh-N <sub>3</sub> P | -3.72 |
| Ti-N <sub>3</sub> B | -1.35 | Pd-N <sub>3</sub> P | -1.40 |
| Rh-N <sub>3</sub> B | -2.22 | Ta-N <sub>3</sub> P | -1.94 |
| Ta-N <sub>3</sub> B | -2.28 | W-N <sub>3</sub> P  | -3.61 |
| W-N <sub>3</sub> B  | -3.22 | Re-N <sub>3</sub> P | -2.20 |
| Re-N <sub>3</sub> B | -1.63 | Os-N <sub>3</sub> P | -1.04 |
| Pt-N <sub>3</sub> B | -4.93 | Pt-N <sub>3</sub> P | -4.79 |
|                     |       | Cr-N <sub>3</sub> S | -0.64 |
|                     |       | Ru-N <sub>3</sub> S | -0.53 |
|                     |       | Rh-N <sub>3</sub> S | -3.99 |
|                     |       | Pd-N <sub>3</sub> S | -2.06 |
|                     |       | Ta-N <sub>3</sub> S | -2.07 |
|                     |       | Pt-N <sub>3</sub> S | -5.38 |
